# Supplementary material for: The Mother Enrichment Program: A Genetic System for Facile Replicative Life Span Analysis in Saccharomyces cerevisiae
Source: Oxford University Press journal article supplement (doi:10.1534/genetics.109.106229), 2009-08-03
Supplement: 0413_figures1.pdf [file 0413_figures1.pdf]

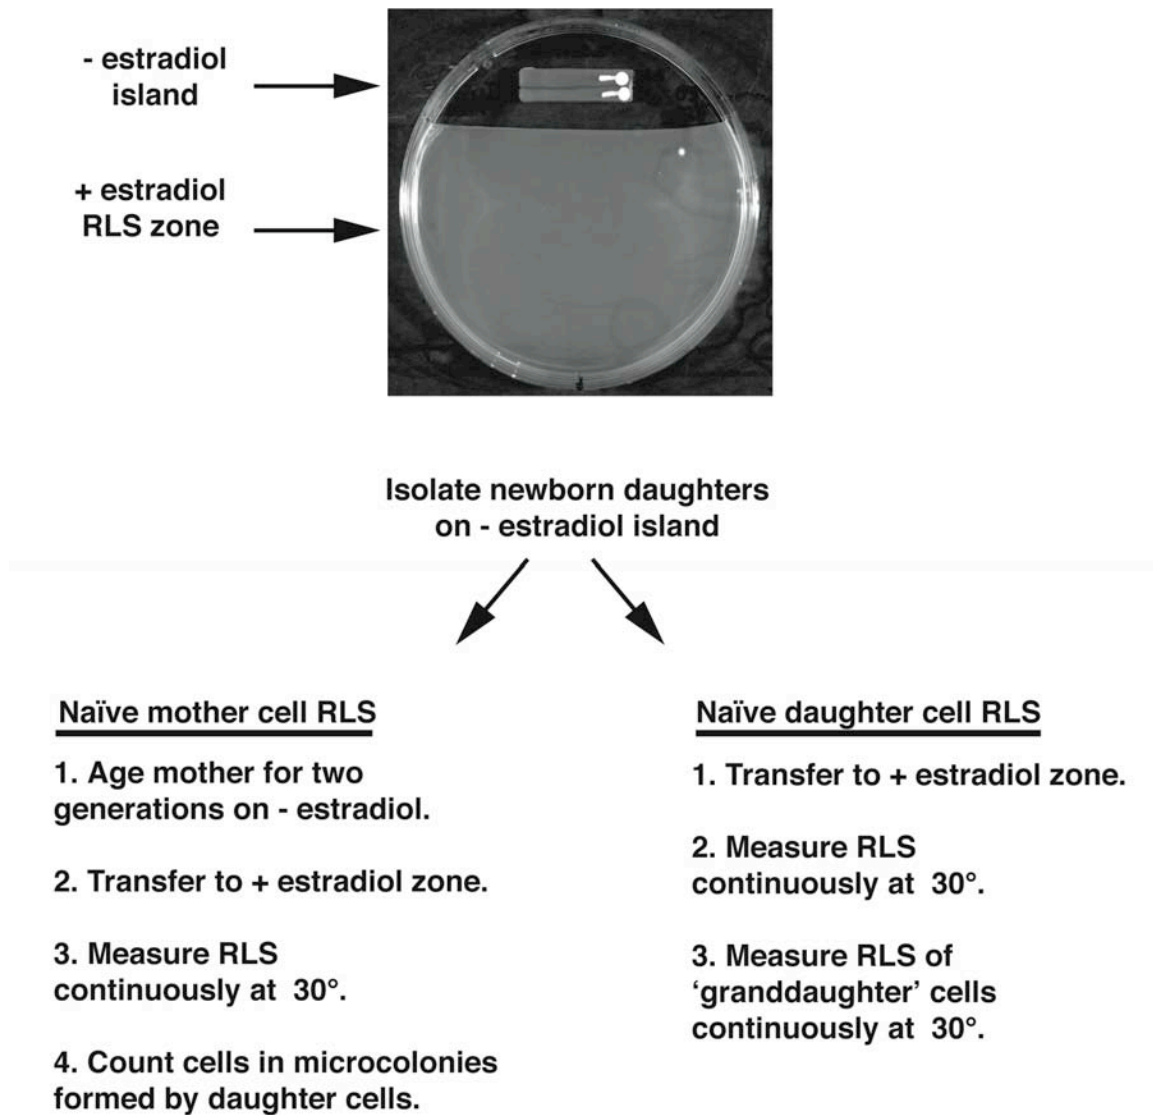

FIGURE S1.—Diagram of the experimental approach for measuring naïve mother and daughter RLS on media containing estradiol.
