# Supplementary material for: The Mother Enrichment Program: A Genetic System for Facile Replicative Life Span Analysis in Saccharomyces cerevisiae
Source: Oxford University Press journal article supplement (doi:10.1534/genetics.109.106229), 2009-08-03
Supplement: 0413_figures3.pdf [file 0413_figures3.pdf]

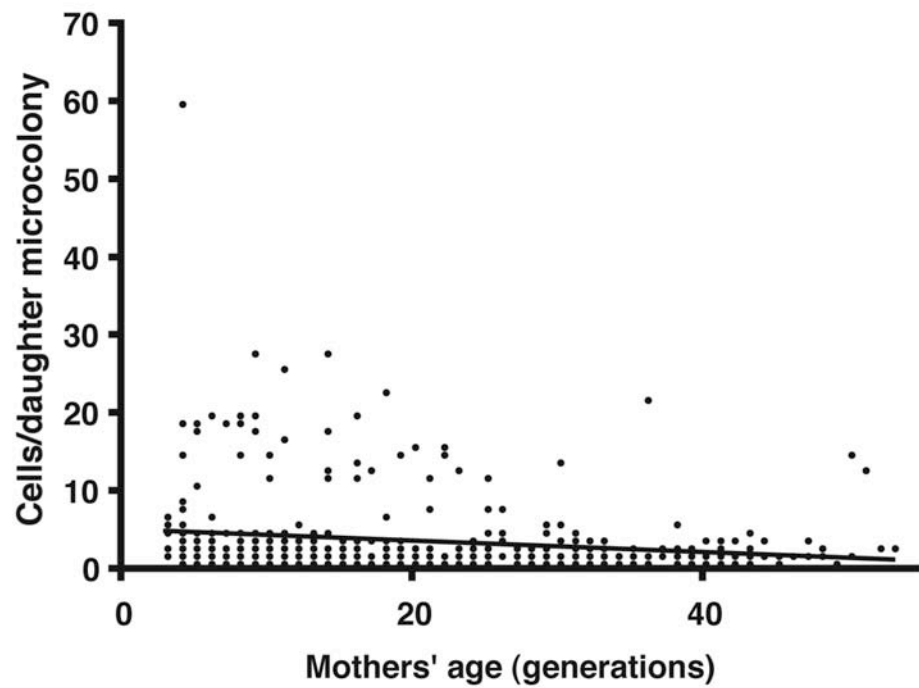

FIGURE S3.—A scatter plot comparing daughter's birth order (reflecting the age of the mother cell) to the number of cells in the daughter-cell microcolony (a measure of the daughter's proliferative capacity). The plot represents 472 daughter cells born on estradiol during the RLS analysis of naïve mothers. A best-fit line indicates negative correlation between mother's age and daughter's proliferative capacity.
