# Supplementary material for: The Mother Enrichment Program: A Genetic System for Facile Replicative Life Span Analysis in Saccharomyces cerevisiae
Source: Oxford University Press journal article supplement (doi:10.1534/genetics.109.106229), 2009-08-03
Supplement: 0413_figures4.pdf [file 0413_figures4.pdf]

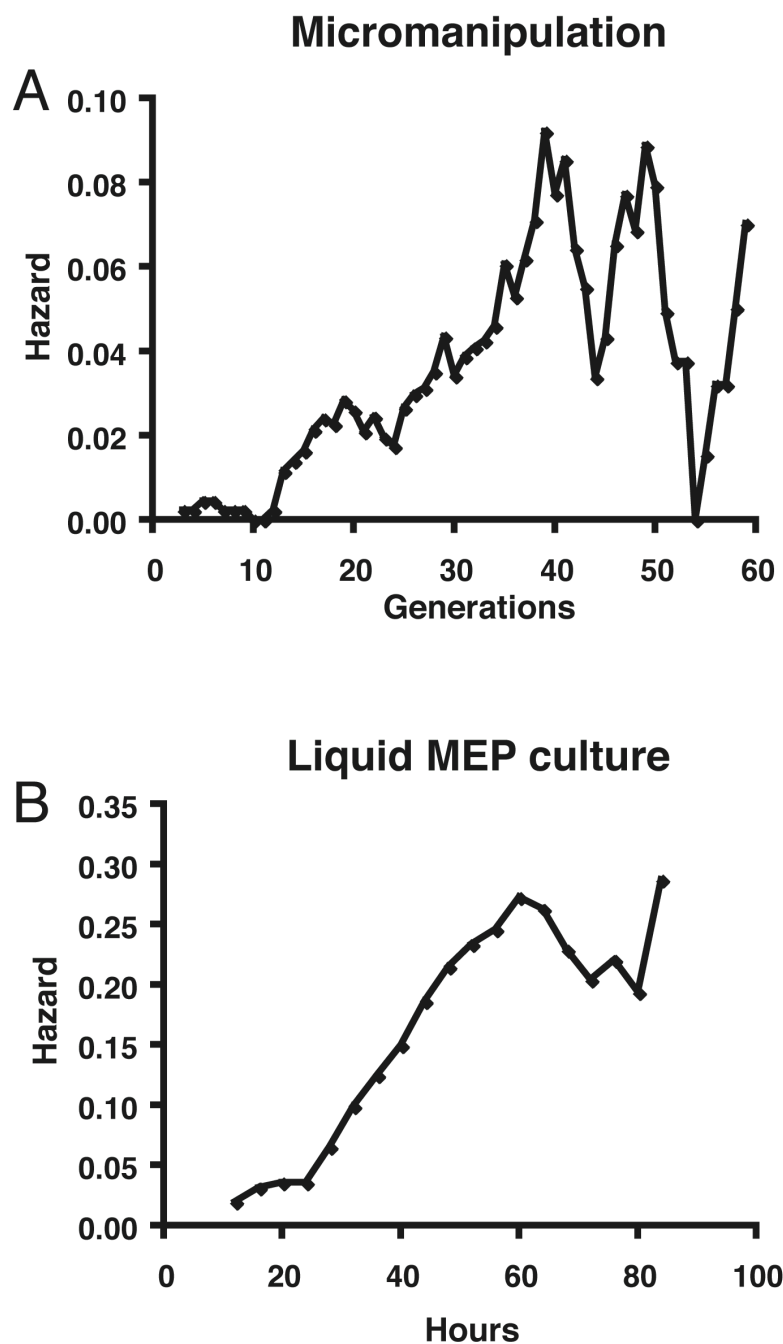

FIGURE S4.—(A) Hazard rate plot (# deaths/# individuals at risk) of UCC5185 RLS measured on estradiol media by micromanipulation, smoothed over an average of five neighbors. Hazard plots of wild type yeast populations typically display a low hazard rate at young ages, followed by an exponentially increasing rate. At very old ages, the small number of individuals observed results in large variations in hazard rate. (B) Hazard rate plot of UCC8848 viability measured in liquid estradiol media, smoothed over an average of five neighbors. To allow smoothing, intermediate values were estimated for four hour intervals based on a linear change in viability between sampling points.
