# Supplementary material for: The Mother Enrichment Program: A Genetic System for Facile Replicative Life Span Analysis in Saccharomyces cerevisiae
Source: Oxford University Press journal article supplement (doi:10.1534/genetics.109.106229), 2009-08-03
Supplement: 0413_figures5.pdf [file 0413_figures5.pdf]

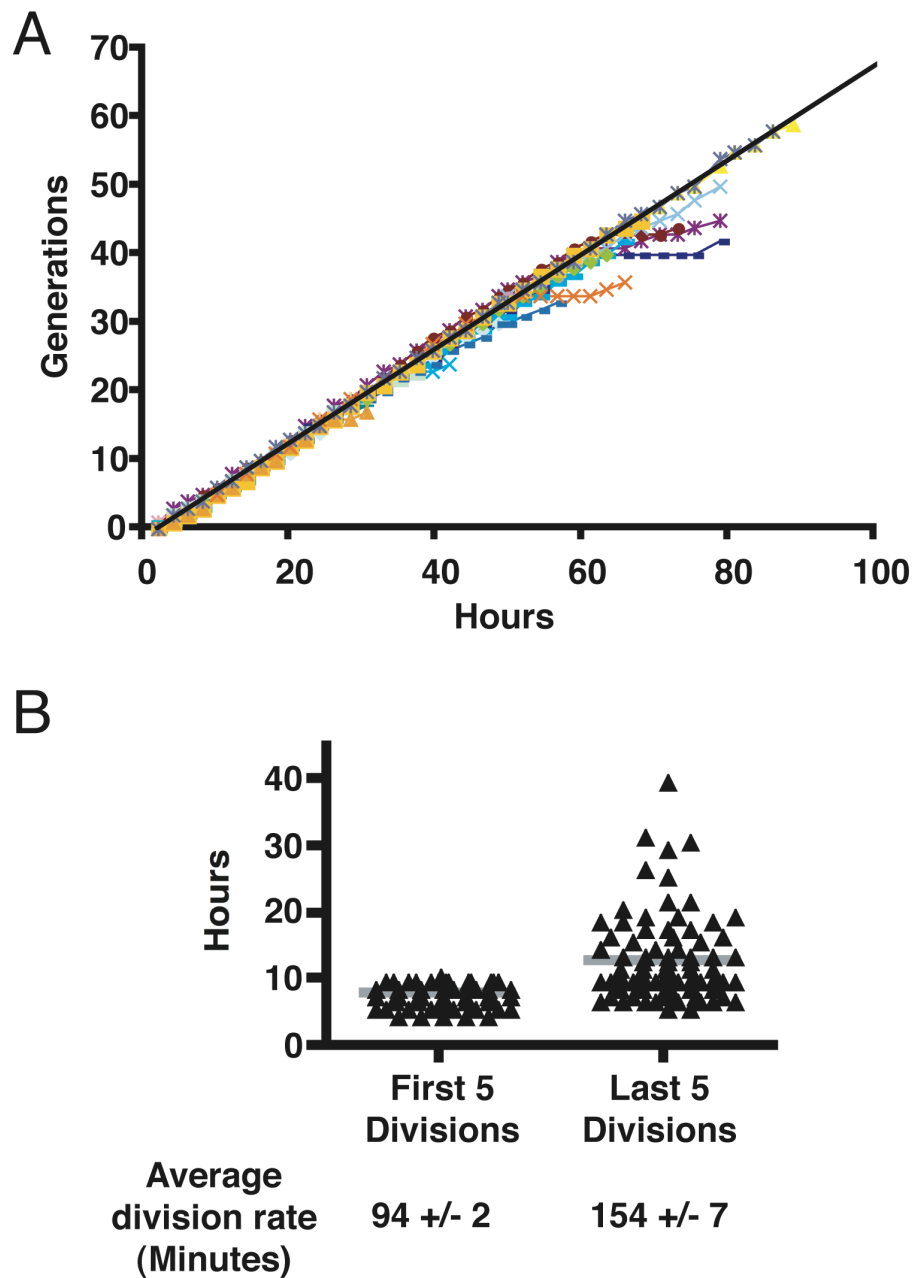

FIGURE S5.—(A) Division rates of 22 individual mother cells (UCC5185) during RLS measurement on estradiol media. A linear best-fit trendline (black,  $R=0.9992$ ) based on the first 20 generations indicates a constant division rate of 87 minutes. Individual mothers approaching the end of their RLS often fall away from the trendline, indicating prolonged cell division times. (B) Time required for individual mothers to complete their first five divisions, and last five divisions before senescence. Each group represents a combined analysis of four pedigrees of UCC5185 (two on YEPD, two on estradiol media,  $n=99$ ). Crossbars indicate the mean value of each group. The average division rate in minutes represents the mean value divided by five divisions.
